# Supplementary material for: Microbial Modifications of Androstane and Androstene Steroids by Penicillium vinaceum
Source: MDPI journal article supplement (doi:10.3390/molecules25184226), 2020-09-15
Supplement: s1 [file s1]

## Supporting Information

# Microbial modifications of androstane and androstene steroids by *Penicillium vinaceum*

Anna Panek \*, Paulina Łyczko, and Alina Świzdor

\* Correspondence: [anna.panek@upwr.edu.pl](mailto:anna.panek@upwr.edu.pl)

Department of Chemistry, Wrocław University of Environmental and Life Sciences, Norwida 25, 50-375 Wrocław, Poland

### Contents:

|                                                                                             |   |
|---------------------------------------------------------------------------------------------|---|
| Figure S1. <sup>1</sup> H NMR spectrum of 17β,19-dihydroxyandrost-4-en-3-one ( <b>12</b> )  | 2 |
| Figure S2. <sup>13</sup> C NMR spectrum of 17β,19-dihydroxyandrost-4-en-3-one ( <b>12</b> ) | 3 |
| Figure S3. <sup>1</sup> H NMR spectrum of 19-nortestololactone ( <b>13</b> )                | 4 |
| Figure S4. <sup>13</sup> C NMR spectrum of 19-nortestololactone ( <b>13</b> )               | 5 |
| Figure S5. GC spectrum of 17β,19-dihydroxyandrost-4-en-3-one ( <b>12</b> )                  | 6 |
| Figure S6. GC spectrum of 19-nortestololactone ( <b>13</b> )                                | 7 |

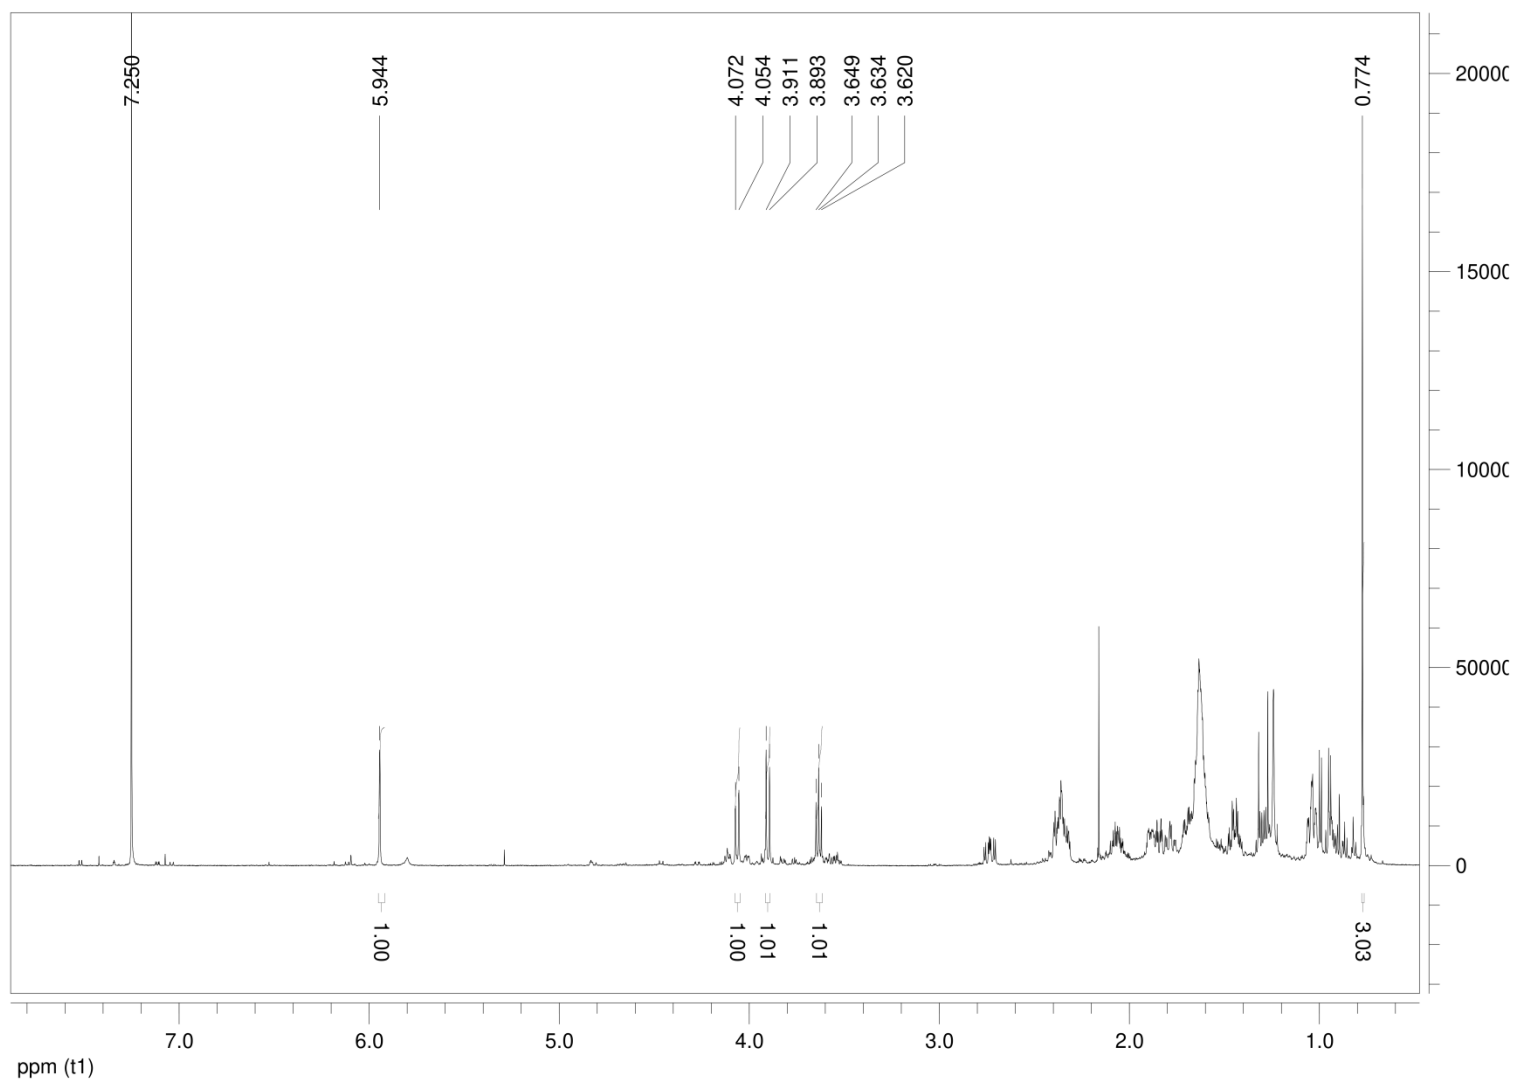

Figure S1.  $^1\text{H}$  NMR spectrum of 17 $\beta$ ,19-dihydroxyandrost-4-en-3-one (**12**)

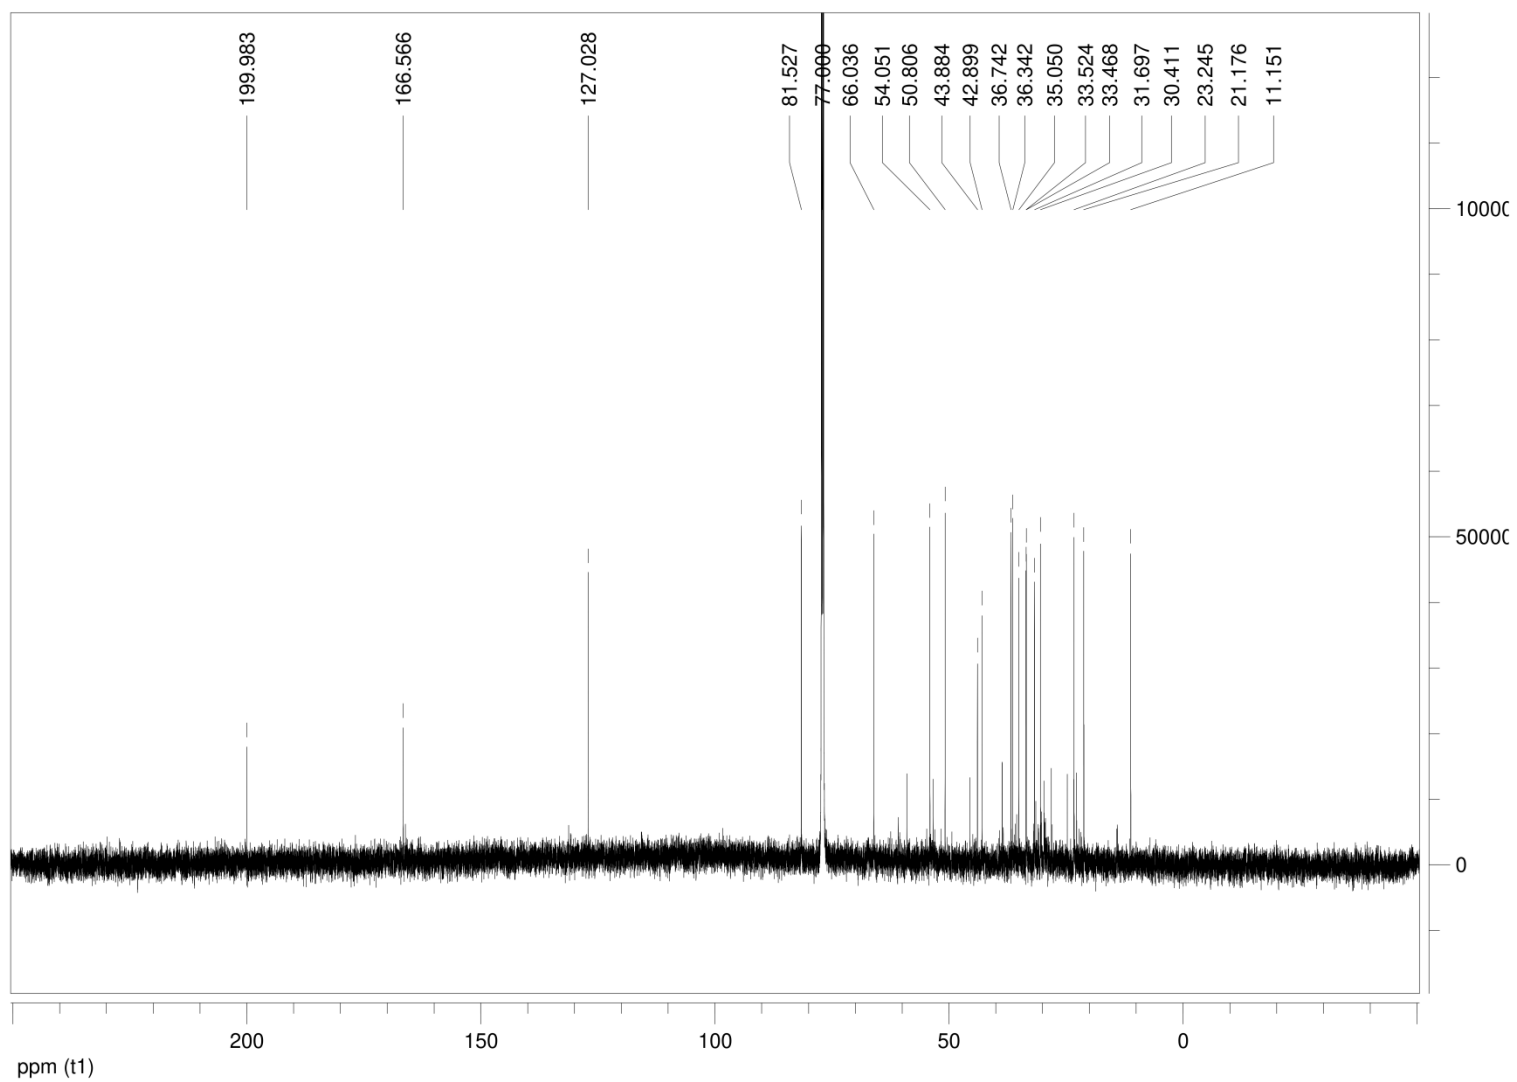

Figure S2. <sup>13</sup>C NMR spectrum of 17β,19-dihydroxyandrost-4-en-3-one (**12**)

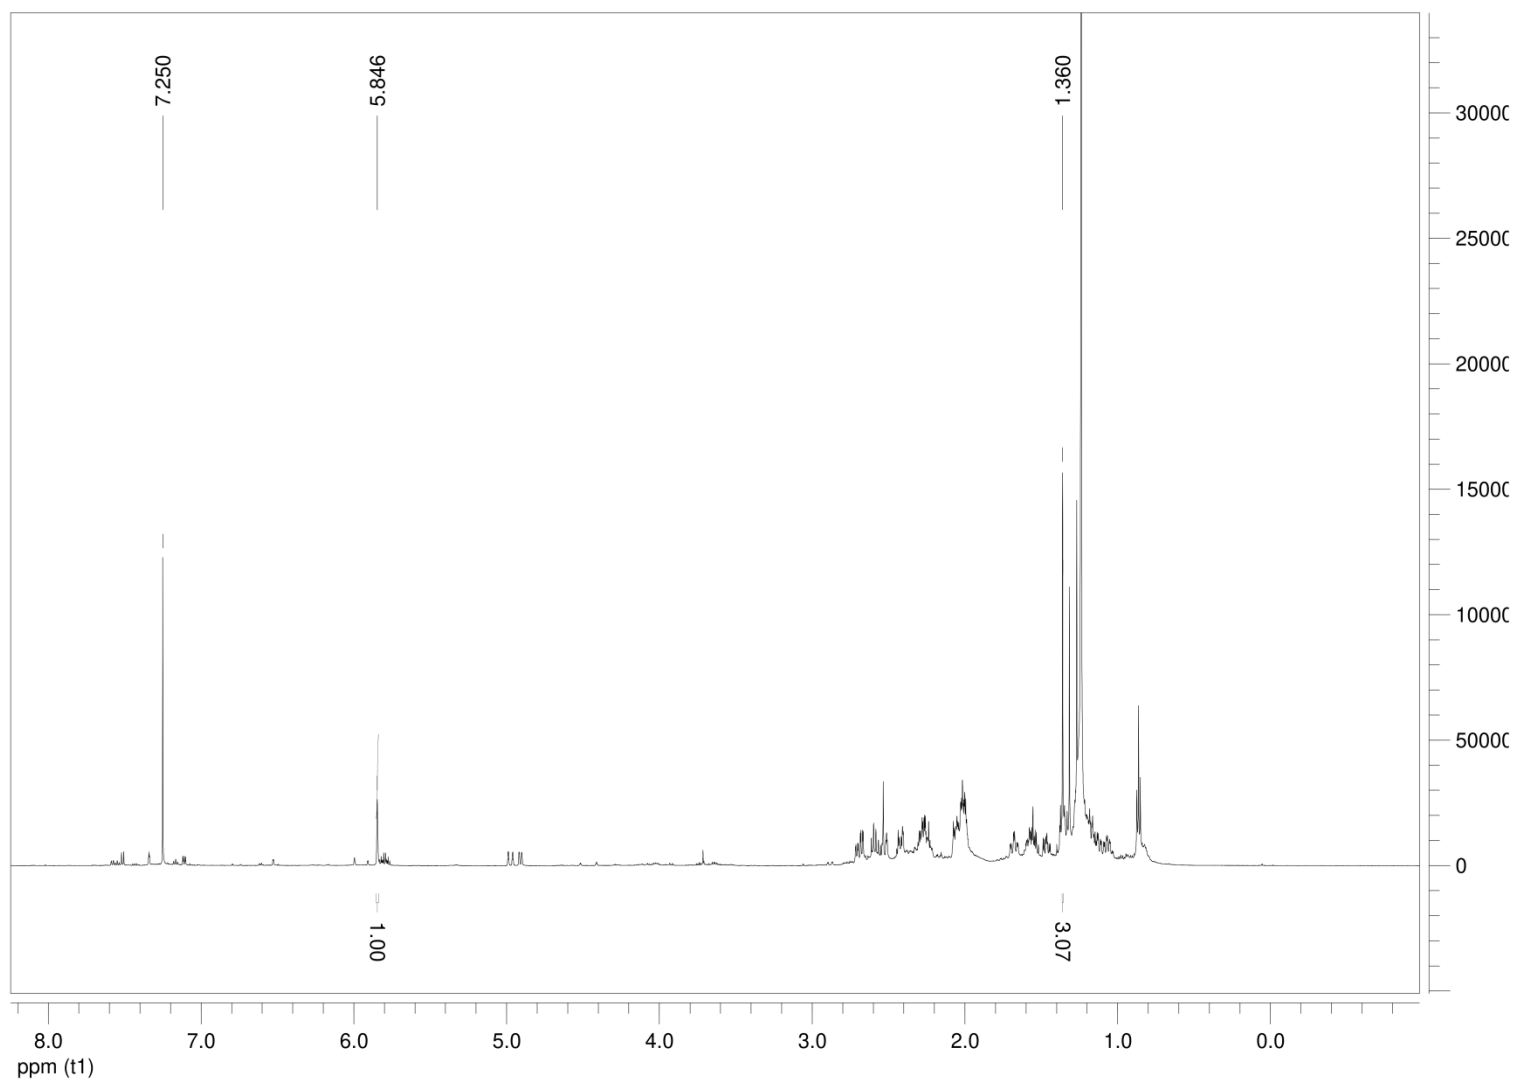

Figure S3.  $^1\text{H}$  NMR spectrum of 19-nortestolactone (**13**)

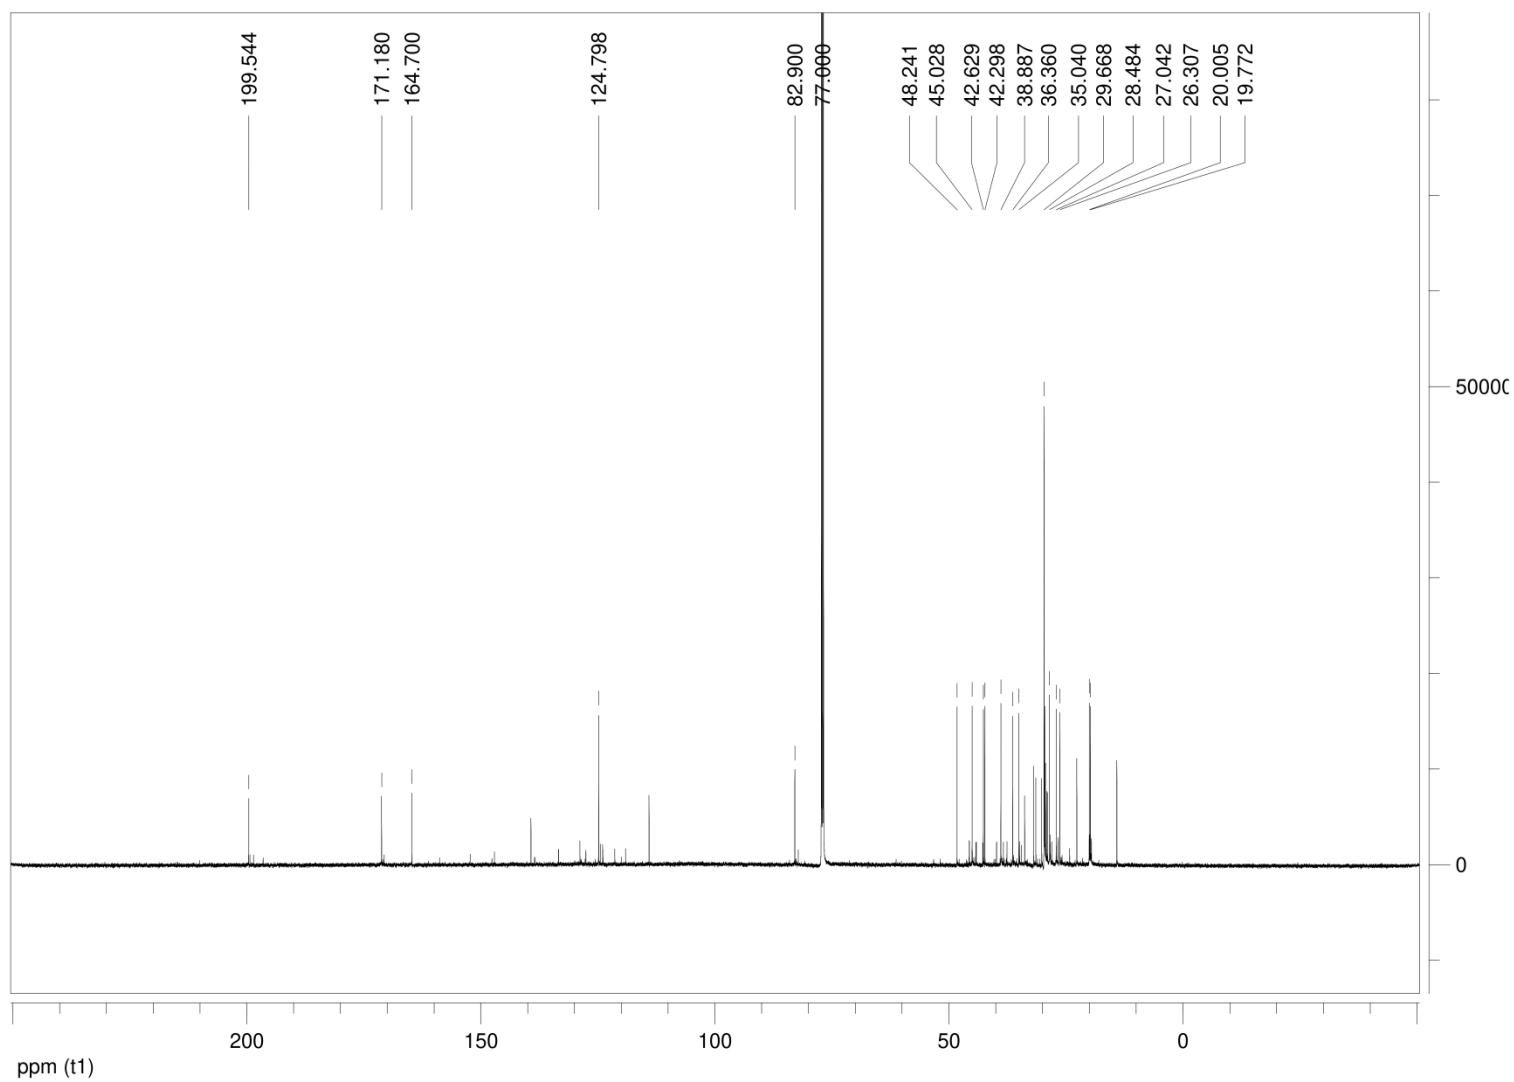

Figure S4.  $^{13}\text{C}$  NMR spectrum of 19-nortestololactone (**13**)

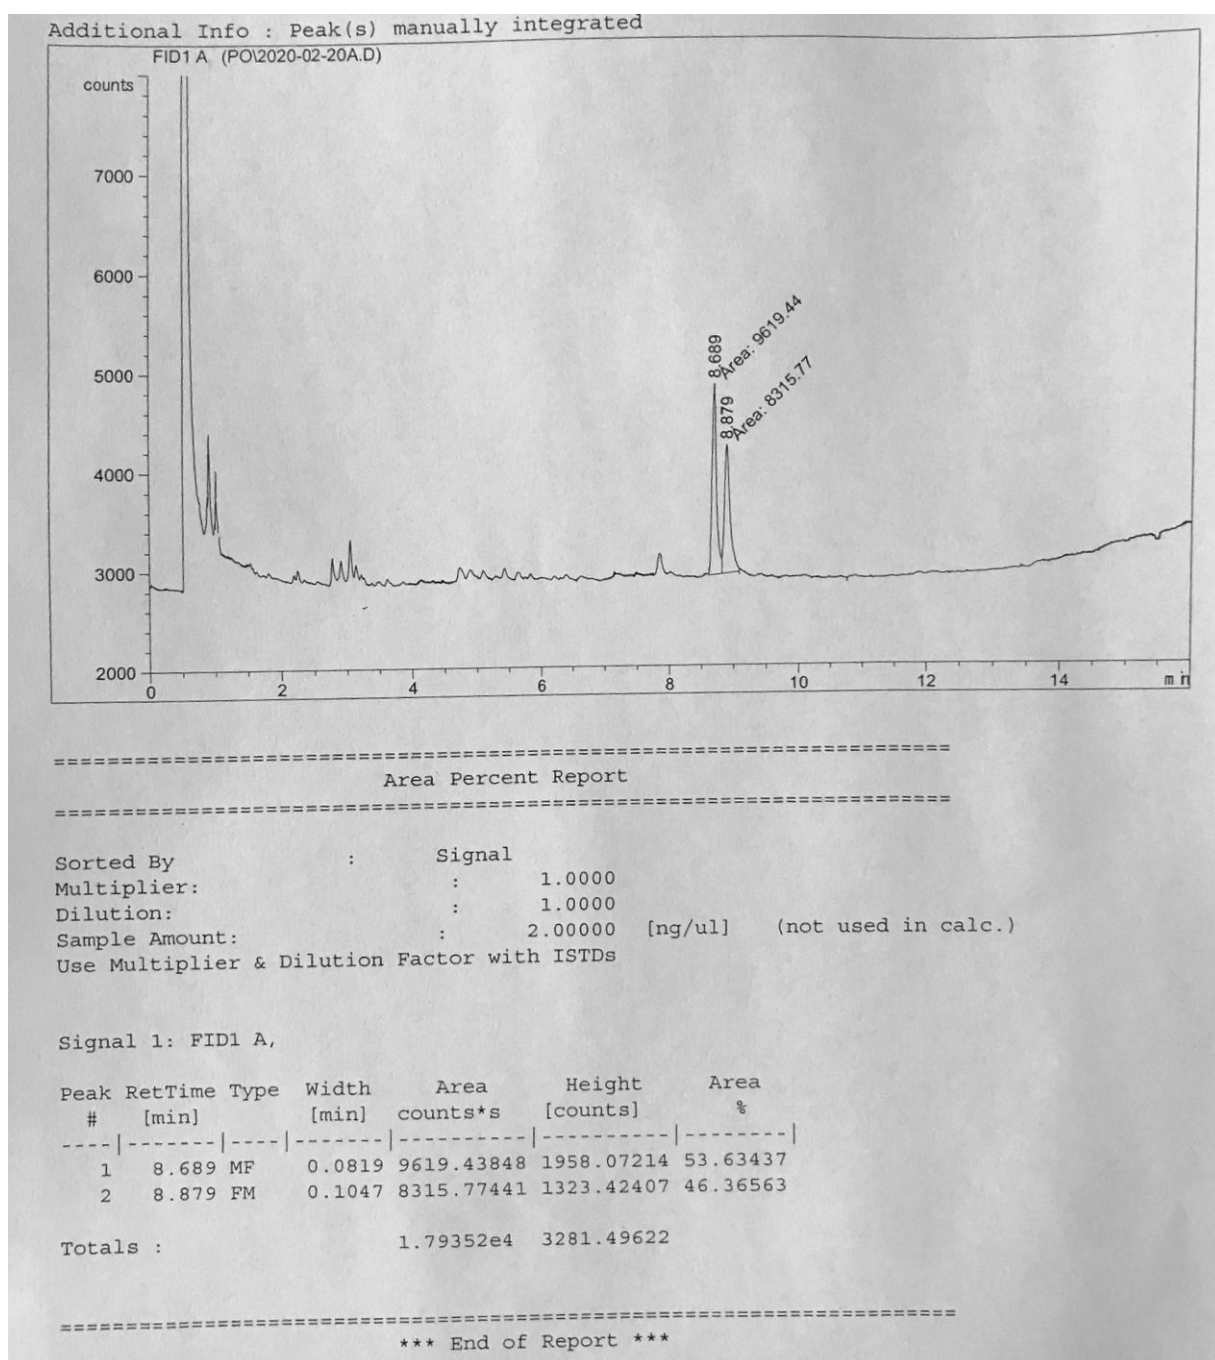

Figure S5. GC spectrum of  $17\beta,19$ -dihydroxyandrost-4-en-3-one (**12**). This spectrum was obtained from extracts isolated during time course experiments and contains signals from the substrate **5** and the product **12**.

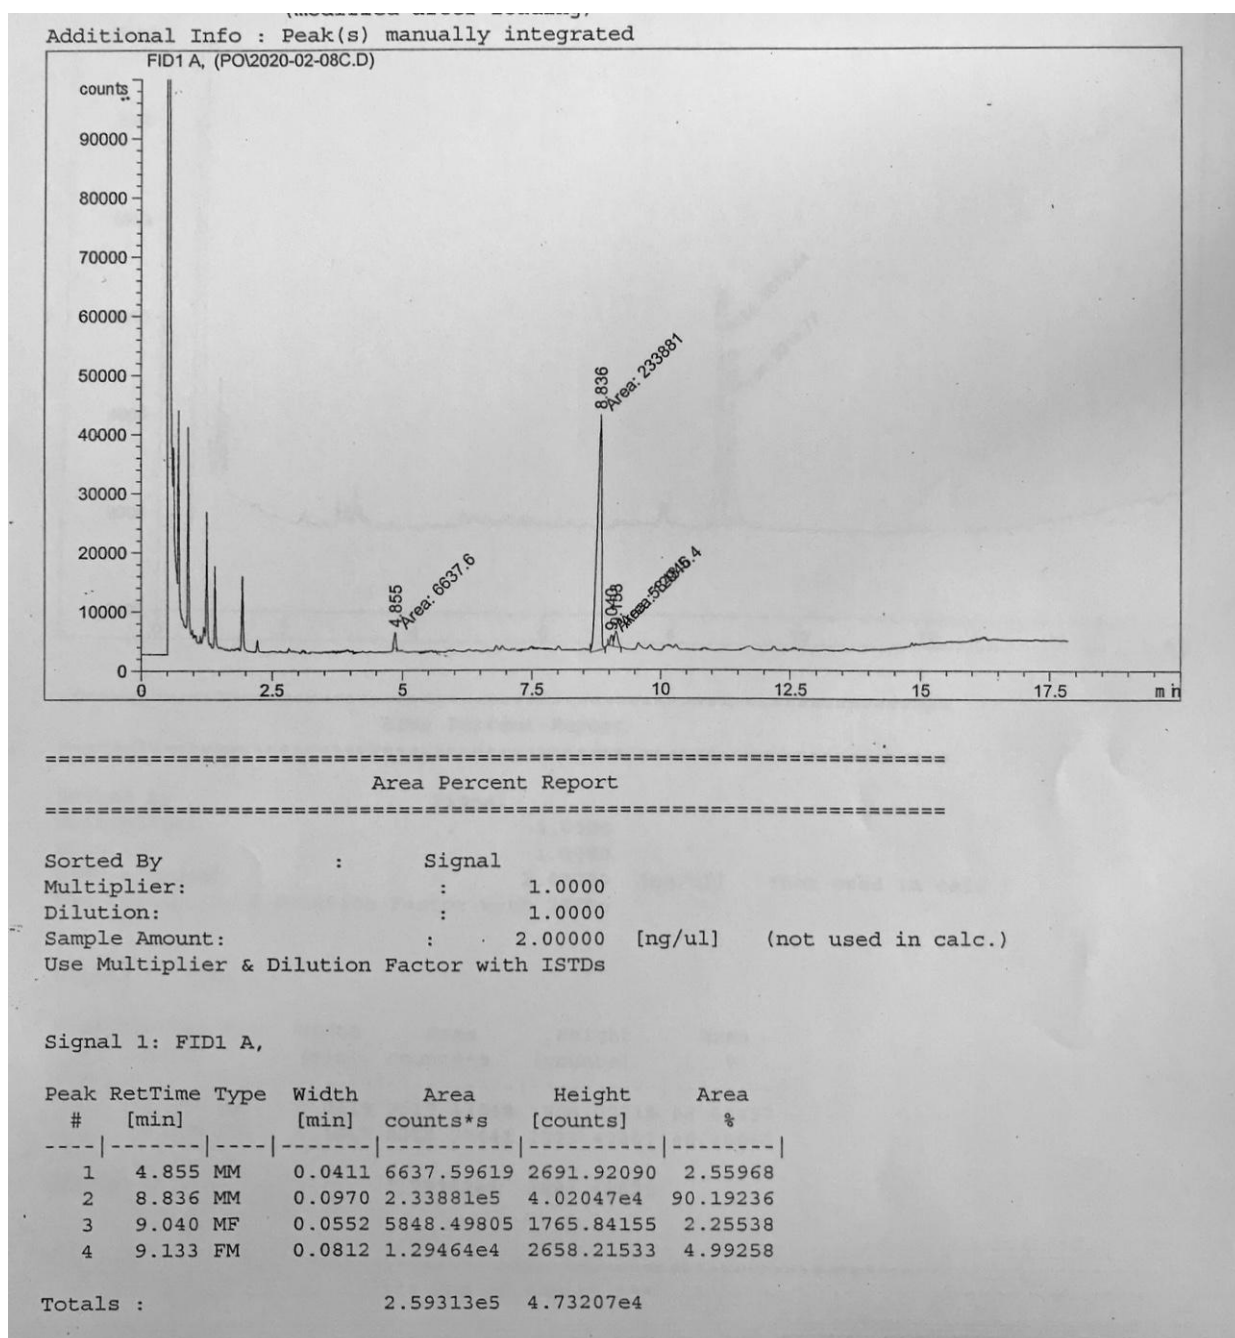

Figure S6. GC spectrum of 19-nortestololactone (**13**). This spectrum was obtained from extracts isolated during time course experiments and contains signals from the substrate **7** and the product **13**.
